# Supplementary material
Source: PubMed Central journal article supplement (PMC3911055)
Supplement: AEM.03560-13_zam999105117so1.pdf [file AEM.03560-13_zam999105117so1.pdf]

Table S1. *A. gossypii* strains used in this study.

| <i>Strain</i>                    | <i>Genotype</i>                                                              | <i>Phenotype</i>                        | <i>Source</i> |
|----------------------------------|------------------------------------------------------------------------------|-----------------------------------------|---------------|
| WT                               | wild type (ATCC 10895)                                                       | WT                                      | our lab stock |
| <i>pox1</i> Δ                    | <i>pox1::loxP-KanMX4-loxP</i>                                                | G418 <sup>R</sup>                       | this work     |
| <i>fox2</i> Δ                    | <i>fox2::loxP-NatMX-loxP</i>                                                 | cloNAT <sup>R</sup>                     | this work     |
| <i>pox1</i> Δ, <i>fox2</i> Δ     | <i>pox1::loxP-KanMX4-loxP, fox2::loxP-NatMX-loxP</i>                         | G418 <sup>R</sup> , cloNAT <sup>R</sup> | this work     |
| <i>ACL1</i>                      | <i>leu2::loxP-KanMX4-loxP-pGPD1-ACL1</i>                                     | leu <sup>-</sup> , G418 <sup>R</sup>    | this work     |
| <i>ACL2</i>                      | <i>ste12::loxP-KanMX4-loxP-pGPD1-ACL2</i>                                    | G418 <sup>R</sup>                       | this work     |
| <i>ACL1, ACL2</i>                | <i>leu2::loxP-pGPD1-ACL1, ste12::loxP-KanMX4-loxP-pGPD1-ACL2</i>             | leu <sup>-</sup> , G418 <sup>R</sup>    | this work     |
| <i>pox1</i> Δ, <i>ACL1</i>       | <i>pox1::loxP, leu2::loxP-KanMX4-loxP-pGPD1-ACL1</i>                         | leu <sup>-</sup> , G418 <sup>R</sup>    | this work     |
| <i>pox1</i> Δ, <i>ACL2</i>       | <i>pox1::loxP, ste12::loxP-KanMX4-loxP-pGPD1-ACL2</i>                        | G418 <sup>R</sup>                       | this work     |
| <i>pox1</i> Δ, <i>ACL1, ACL2</i> | <i>pox1::loxP, leu2::loxP-pGPD1-ACL1, ste12::loxP-KanMX4-loxP-pGPD1-ACL2</i> | leu <sup>-</sup> , G418 <sup>R</sup>    | this work     |

Table S2. List of primers used in this study.

| <i>Primer</i>     | <i>Sequence</i>                                                                                                                      | <i>Purpose</i>            |
|-------------------|--------------------------------------------------------------------------------------------------------------------------------------|---------------------------|
| AgPOX1-del5       | 5'-GGCAGCTAGCGGTGGCTATAAAGAGCGGGAAAAAGCAGAGCGTAGCAGCAGCCAAGG<br>ATCGACAAGATGCGGATCCCCGGGTTAATTAA-3'                                  | deletion                  |
| AgPOX1-del3       | 5'-GTAATATCAGCGAGCAGAGATAGACTCAACTACTTGCCCAAGGTTCTTGAAGGAGGTCTCG<br>CTGATGTTTCTGAGATTCGAGCTCGTTTAAAC-3'                              | deletion                  |
| AgFOX2-del5       | 5'-AGCAATCTAGAACAGGGTGGTGAGGCTAGCGCAAAAAGTTTCGAGCTTACACACTCAG<br>CTACAGGCTACATCCAGCAGGTAACCAACGCAGTATATATGCGGATCCCCGGGTTAATTAA-3'    | deletion                  |
| AgFOX2-del3       | 5'-TCGACAAAATGTAAGTAACTGAAAACATTTACTGCGTAGCTAGTACGTATTAATCTAACTGCATA<br>TAATCCTACCGGCTGGAAAAGTACCATAGAAGCCTCAGAATTCGAGCTCGTTTAAAC-3' | deletion                  |
| FWD_Nde_YIACL1    | 5'-GCATATGTCTGCCAACGAGAATC-3'                                                                                                        | ACL1 cloning              |
| REV_Bam_YIACL1    | 5'-CGGATCCTATGATCGAGTCTTGGCC-3'                                                                                                      | ACL1 cloning              |
| ACL1-RTfw         | 5'-GAGGCCGACCCCAAGTGTA-3'                                                                                                            | ACL1 qPCR                 |
| ACL1-RTrv         | 5'-TCCTGGGCCCAAGAGTAGTCA-3'                                                                                                          | ACL1 qPCR                 |
| GATG-ACL2-fw      | 5'-AAGGTCTCAGATGTCAGCGAAATCCATTACAG-3'                                                                                               | ACL2 cloning              |
| TAGT-ACL2-rv      | 5'-AAGGTCTCAACTAACTCCGAGAGGAGTGGAAG-3'                                                                                               | ACL2 cloning              |
| ACL2-RTfw         | 5'-GGGCGACTGGATCCTCTTCTACC-3'                                                                                                        | ACL2 qPCR                 |
| ACL2-RTrv         | 5'-TGGGGCCGCACTCAAACCTCT-3'                                                                                                          | ACL2 qPCR                 |
| (GGTC)-GPDp-fw    | 5'-TTTGGTCTCCGGTCGTCTGGGTGCACGACACCTG-3'                                                                                             | ACL2 overex. <sup>1</sup> |
| (GATG)-GPDp-rv    | 5'-TTTGGTCTCACATCTGTGCGGTGTGTATGTGTGGACTGAATTAATCAAACCTCCTGGTCGC<br>TCCACCAGAGTCTCCCGTTG-3'                                          | ACL2 overex. <sup>1</sup> |
| (ATCA)-loxPKS-fw  | 5'-TTTGGTCTCAATCACGGATCCCCGGGTTAATTAA-3'                                                                                             | ACL2 overex. <sup>1</sup> |
| (CGTC)-loxPKS-rv  | 5'-TTTGGTCTCAGACCGAATTCGAGCTCGTTTAAAC-3'                                                                                             | ACL2 overex. <sup>1</sup> |
| (ACAC)-ADR304L-fw | 5'-TTTGGTCTCAACACAGTCCAAAACAGGGGAGCAG                                                                                                | ACL2 overex. <sup>1</sup> |
| (ATCA)-ADR304L-rv | 5'-TTTGGTCTCATGATCCACATGCTGTACGACCTGA-3'                                                                                             | ACL2 overex. <sup>1</sup> |
| (TAGT)-PGK1t-fw   | 5'-TTTGGTCTCATAGTATGCGTCCGCGCGCCTGCCG-3'                                                                                             | ACL2 overex. <sup>1</sup> |
| (ACGC)-PGK1t-rv   | 5'-TTTGGTCTCTGCGTTAGTTTCTCAACTTCCATTACGTGCG-3'                                                                                       | ACL2 overex. <sup>1</sup> |
| (ACGC)-ADR304R-fw | 5'-TTTGGTCTCAACGCACACTGATGACGATCCCAGC-3'                                                                                             | ACL2 overex. <sup>1</sup> |
| (CTTG)-ADR304R-rv | 5'-TTTGGTCTACAAGGATGCAGCCGCATTTTGGAGT-3'                                                                                             | ACL2 overex. <sup>1</sup> |

<sup>1</sup> ACL2 overex. refers to the construction of the ACL2 overexpression module
